# Supplementary material for: Ferrocene decorated unusual mercury(ii) dithiocarbamate coordination polymers: crystallographic and computational studies
Source: Royal Society of Chemistry journal article supplement (doi:10.1039/d0ce01867h), 2021-01-01
Supplement: d0ce01867h1.pdf [file d0ce01867h1.pdf]

## Electronic Supporting Information

# **Ferrocene Decorated Unusual Mercury(II) Dithiocarbamate Coordination Polymers: Crystallographic and Computational Studies**

Amita Singh<sup>a</sup>, Ayushi Singh<sup>a</sup>, Suryabhan Singh,<sup>b</sup> Gabriele Kociok-Köhn,<sup>c</sup> Mohd. Muddassir,<sup>d</sup> and Abhinav Kumar<sup>a\*</sup>

## Electronic Supporting Information

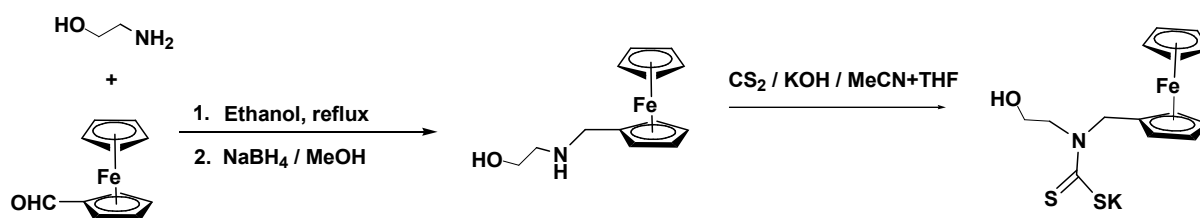

**Scheme S1.** Synthetic routes for the ferrocenyl dithiocarbamate ligand.
